# Supplementary material for: Sparse least trimmed squares regression with compositional covariates for high-dimensional data
Source: Oxford University Press journal article supplement (doi:10.1093/bioinformatics/btab572), 2021-08-03
Supplement: btab572_supplementary_data.pdf [file btab572_supplementary_data.pdf]

Supporting Information for:  
Sparse least trimmed squares regression with  
compositional covariates for high dimensional  
data

Gianna Serafina Monti and Peter Filzmoser

## 1 Parameter selection

Section 2.3 of the manuscript describes the algorithms to reach the best subset for RobZS regression, for each fixed combination of the tuning parameters  $\alpha \in [0, 1]$  and  $\lambda \in [\varepsilon \cdot \lambda_{Max}, \lambda_{Max}]$ , where  $\varepsilon \geq 0$  controls the range. The parameter  $\lambda_{Max}$  is chosen such that all coefficients for a ZeroSum regression on the median-centered response and explanatory variables become zero. To select the optimal combination  $(\alpha_{opt}, \lambda_{opt})$ , leading to the optimal subset  $H_{opt}$ , a repeated K-fold CV procedure on a two-dimensional surface is adopted, with  $K = 5$ .

In K-fold CV the data are split into folds  $V_1, \dots, V_K$  of approximately equal size. The so-called out-of-fold observations  $i \notin V_k$  which are not part of the  $k$ -th fold  $V_k$ , for  $k \in \{1, \dots, K\}$ , are used for training the model, and in-fold observations  $i \in V_k$  for evaluating it.

Note that we only consider samples of size  $h$  at this stage which are supposed to be outlier-free, and thus the derived prediction error criterion is robust. As criterion we use the root mean squared prediction error (RMSPE),

$$\text{RMSPE}(\alpha, \lambda) = \sqrt{\frac{1}{h} \sum_{k=1}^K \sum_{i \in V_k} (r_i(\hat{\beta}(\alpha, \lambda)))^2} \quad (1)$$

The 5-fold CV procedure is repeated five times in order to get higher stability for the resulting parameter selection. Thus, for each combination of tuning parameters, five RMSPE values from (1) are obtained. The chosen couple  $(\alpha_{opt}, \lambda_{opt})$ , over a grid of values  $\alpha$  and  $\lambda$ , is the one giving the smallest CV error of the average of the five replications. When using only the Lasso penalty (thus  $\alpha = 1$ ), we use the same procedure with repeated  $K$ -fold CV, but the computational cost reduces considerably as the search is only required for one parameter.

Here,  $\lambda_{Max}$  is chosen to get a model with full sparsity. In the simulations we considered 41 equally spaced values for  $\alpha$ , and a grid of 40 values for  $\lambda$ .

## 2 Simulation results

In this section we report additional simulation results to empirically study the performance of the RobZS estimator with respect to different aspects:

- (a) Section 2.1 presents more details of using different contamination schemes (see Section 3.1 of the main paper), with 10% and 20% of contamination;
- (b) Section 2.2 investigates the effect of the proposed debiasing strategies (see Section 2.3 of the main paper), i.e. the rescaled, the relaxed and the hybrid RobZS estimator;
- (c) Section 2.3 studies the behavior of RobZS when the sparsity changes;
- (d) Section 2.4 uses the elastic-net penalty to compare ZS and RobZS.

### 2.1 Simulation results for different contamination schemes

The following simulation results refer to the sampling schemes described in Section 3.1. For the case of 10% contamination we also provide a comparison with the algorithm of Bates and Tibshirani (2019), here abbreviated by “ZS (B&T)”. In their log-ratio lasso estimator they propose a fast approximate algorithm which is used here for comparison. Note that this algorithm does not return an optimized value of the tuning parameter  $\lambda$ , and thus we cannot report loss values. In general, this algorithm performs very similar to the ZS algorithm. A big difference is the excellent performance for the false positives (FP), but a much poorer performance for the false negatives (FN); the latter might be more important in applications.

#### 2.1.1 Level of contamination: 10%

Tables SI-1, SI-2, and SI-3 present the results for the low, moderate, and high-dimensional data configuration respectively, with  $\rho = 0.5$ . Table SI-4 reports the comparison results of selective performance, FP and FN, among different methods, scenarios, and parameter configurations.

|     |          | PE           |       | PE (10%)     |       | loss 1       |       | loss 2       |        | loss $\infty$ |       |
|-----|----------|--------------|-------|--------------|-------|--------------|-------|--------------|--------|---------------|-------|
|     |          | mean         | sd    | mean         | sd    | mean         | sd    | mean         | sd     | mean          | sd    |
| (A) | Lasso    | 0.408        | 0.112 | 0.293        | 0.080 | 1.540        | 0.540 | 0.244        | 0.138  | 0.265         | 0.084 |
|     | ZS       | <b>0.394</b> | 0.103 | <b>0.282</b> | 0.078 | <b>1.457</b> | 0.494 | <b>0.212</b> | 0.121  | <b>0.239</b>  | 0.073 |
|     | RobL     | 0.616        | 0.350 | 0.436        | 0.241 | 2.329        | 1.013 | 0.626        | 0.564  | 0.399         | 0.165 |
|     | RobZS    | 0.953        | 0.528 | 0.684        | 0.406 | 3.321        | 1.213 | 1.050        | 0.698  | 0.525         | 0.179 |
|     | SLTS     | 1.239        | 0.534 | 0.884        | 0.404 | 3.283        | 0.959 | 1.652        | 0.823  | 0.733         | 0.182 |
|     | ZS (B&T) | 0.574        | 0.428 | 0.422        | 0.324 |              |       |              |        |               |       |
| (B) | Lasso    | 4.252        | 2.176 | 4.616        | 1.988 | 5.911        | 2.665 | 4.583        | 2.889  | 1.145         | 0.266 |
|     | ZS       | 4.058        | 1.898 | 4.473        | 2.031 | 5.552        | 2.080 | 4.150        | 2.412  | 1.110         | 0.263 |
|     | RobL     | 0.777        | 0.609 | 0.882        | 0.696 | <b>2.509</b> | 1.398 | 0.862        | 0.989  | 0.463         | 0.249 |
|     | RobZS    | <b>0.713</b> | 0.322 | <b>0.811</b> | 0.370 | 2.718        | 1.018 | <b>0.709</b> | 0.451  | <b>0.426</b>  | 0.138 |
|     | SLTS     | 0.807        | 0.366 | 0.913        | 0.415 | 2.531        | 0.850 | 0.973        | 0.533  | 0.572         | 0.163 |
|     | ZS (B&T) | 5.199        | 2.156 | 5.693        | 2.337 |              |       |              |        |               |       |
| (C) | Lasso    | 17.318       | 7.031 | 14.890       | 4.443 | 13.166       | 3.899 | 19.323       | 10.123 | 2.535         | 0.681 |
|     | ZS       | 16.885       | 6.449 | 15.353       | 4.277 | 12.013       | 3.019 | 15.064       | 5.915  | 2.211         | 0.493 |
|     | RobL     | <b>0.743</b> | 0.403 | <b>0.838</b> | 0.466 | <b>2.535</b> | 0.937 | 0.775        | 0.541  | 0.468         | 0.170 |
|     | RobZS    | 0.755        | 0.437 | 0.843        | 0.498 | 2.718        | 1.210 | <b>0.725</b> | 0.515  | <b>0.434</b>  | 0.157 |
|     | SLTS     | 0.896        | 0.412 | 0.999        | 0.469 | 2.729        | 0.904 | 1.091        | 0.606  | 0.589         | 0.169 |
|     | ZS (B&T) | 21.443       | 6.958 | 18.255       | 4.827 |              |       |              |        |               |       |

Table SI-1: Means and standard deviations of various performance measures among different methods, based on 100 simulations. Parameter configuration:  $(n, p)=(50, 30)$ ,  $\rho = 0.5$ .

|     |          | PE           |       | PE (10%)     |       | loss 1       |       | loss 2       |       | loss $\infty$ |       |
|-----|----------|--------------|-------|--------------|-------|--------------|-------|--------------|-------|---------------|-------|
|     |          | mean         | sd    | mean         | sd    | mean         | sd    | mean         | sd    | mean          | sd    |
| (A) | Lasso    | 0.437        | 0.085 | 0.312        | 0.067 | 2.172        | 0.515 | 0.305        | 0.121 | 0.298         | 0.086 |
|     | ZS       | <b>0.429</b> | 0.088 | <b>0.306</b> | 0.071 | <b>2.100</b> | 0.582 | <b>0.280</b> | 0.111 | <b>0.283</b>  | 0.076 |
|     | RobL     | 0.819        | 0.680 | 0.581        | 0.479 | 3.252        | 1.583 | 0.963        | 1.137 | 0.480         | 0.253 |
|     | RobZS    | 1.066        | 0.448 | 0.752        | 0.325 | 3.939        | 1.062 | 1.363        | 0.696 | 0.610         | 0.162 |
|     | SLTS     | 1.247        | 0.479 | 0.867        | 0.341 | 3.838        | 1.042 | 1.729        | 0.768 | 0.722         | 0.173 |
|     | ZS (B&T) | 0.479        | 0.434 | 0.335        | 0.302 |              |       |              |       |               |       |
| (B) | Lasso    | 4.372        | 1.459 | 4.860        | 1.578 | 6.975        | 2.929 | 4.476        | 1.382 | 1.111         | 0.184 |
|     | ZS       | 4.216        | 1.291 | 4.682        | 1.402 | 6.572        | 2.172 | 4.344        | 1.208 | 1.122         | 0.203 |
|     | RobL     | 1.052        | 0.629 | 1.180        | 0.687 | 3.683        | 1.310 | 1.248        | 0.925 | 0.568         | 0.226 |
|     | RobZS    | <b>0.845</b> | 0.387 | <b>0.949</b> | 0.440 | 3.375        | 0.852 | <b>0.930</b> | 0.498 | <b>0.499</b>  | 0.138 |
|     | SLTS     | 0.925        | 0.426 | 1.042        | 0.482 | <b>3.192</b> | 0.966 | 1.119        | 0.569 | 0.567         | 0.142 |
|     | ZS (B&T) | 4.714        | 1.764 | 5.209        | 1.849 |              |       |              |       |               |       |
| (C) | Lasso    | 5.666        | 1.041 | 4.128        | 0.667 | 11.735       | 2.213 | 13.622       | 1.759 | 2.107         | 0.229 |
|     | ZS       | 9.814        | 1.794 | 7.537        | 1.269 | 10.835       | 1.900 | 9.691        | 1.374 | 1.782         | 0.245 |
|     | RobL     | 0.980        | 0.675 | 1.107        | 0.785 | 3.687        | 1.484 | 1.191        | 1.006 | 0.557         | 0.219 |
|     | RobZS    | <b>0.773</b> | 0.330 | <b>0.866</b> | 0.377 | 3.271        | 0.981 | <b>0.897</b> | 0.579 | <b>0.482</b>  | 0.155 |
|     | SLTS     | 0.901        | 0.349 | 1.013        | 0.399 | <b>3.329</b> | 0.958 | 1.186        | 0.590 | 0.584         | 0.149 |
|     | ZS (B&T) | 13.829       | 2.519 | 10.110       | 1.881 |              |       |              |       |               |       |

Table SI-2: Means and standard deviations of various performance measures among different methods, based on 100 simulations. Parameter configuration:  $(n, p)=(100, 200)$ ,  $\rho = 0.5$ .

|     |          | PE           |       | PE (10%)     |       | loss 1       |       | loss 2       |       | loss $\infty$ |       |
|-----|----------|--------------|-------|--------------|-------|--------------|-------|--------------|-------|---------------|-------|
|     |          | mean         | sd    | mean         | sd    | mean         | sd    | mean         | sd    | mean          | sd    |
| (A) | Lasso    | 0.757        | 0.256 | 0.535        | 0.186 | 3.827        | 0.852 | 0.927        | 0.455 | 0.515         | 0.128 |
|     | ZS       | <b>0.725</b> | 0.253 | <b>0.515</b> | 0.167 | <b>3.730</b> | 0.884 | <b>0.840</b> | 0.417 | <b>0.490</b>  | 0.142 |
|     | RobL     | 2.335        | 1.308 | 1.674        | 0.966 | 5.642        | 1.545 | 3.234        | 1.708 | 0.932         | 0.301 |
|     | RobZS    | 1.705        | 0.868 | 1.211        | 0.619 | 4.891        | 1.308 | 2.364        | 1.239 | 0.798         | 0.244 |
|     | SLTS     | 2.322        | 0.759 | 1.652        | 0.540 | 5.984        | 0.947 | 3.290        | 0.873 | 0.976         | 0.164 |
|     | ZS (B&T) | 0.831        | 0.800 | 0.602        | 0.597 |              |       |              |       |               |       |
| (B) | Lasso    | 4.811        | 1.523 | 5.179        | 1.443 | 7.078        | 2.974 | 5.175        | 0.976 | 1.248         | 0.171 |
|     | ZS       | 4.847        | 1.392 | 5.239        | 1.387 | 7.324        | 2.795 | 5.175        | 0.956 | 1.242         | 0.183 |
|     | RobL     | 2.534        | 1.009 | 2.828        | 1.117 | 5.971        | 1.252 | 3.528        | 1.145 | 0.984         | 0.201 |
|     | RobZS    | <b>1.379</b> | 0.658 | <b>1.548</b> | 0.749 | <b>4.365</b> | 1.205 | <b>1.927</b> | 1.005 | <b>0.710</b>  | 0.215 |
|     | SLTS     | 1.705        | 0.532 | 1.919        | 0.623 | 5.375        | 0.917 | 2.468        | 0.735 | 0.826         | 0.142 |
|     | ZS (B&T) | 5.823        | 2.659 | 6.273        | 2.732 |              |       |              |       |               |       |
| (C) | Lasso    | 3.522        | 0.847 | 2.577        | 0.653 | 9.468        | 1.408 | 8.122        | 0.863 | 1.588         | 0.200 |
|     | ZS       | 7.538        | 1.432 | 5.537        | 0.989 | 9.912        | 1.398 | 8.169        | 0.939 | 1.619         | 0.182 |
|     | RobL     | 2.640        | 1.045 | 2.969        | 1.204 | 5.957        | 1.344 | 3.642        | 1.137 | 1.006         | 0.203 |
|     | RobZS    | <b>1.435</b> | 0.621 | <b>1.614</b> | 0.705 | <b>4.531</b> | 0.977 | <b>1.965</b> | 0.955 | <b>0.731</b>  | 0.205 |
|     | SLTS     | 1.873        | 0.534 | 2.104        | 0.607 | 5.486        | 0.897 | 2.615        | 0.734 | 0.853         | 0.146 |
|     | ZS (B&T) | 11.061       | 2.439 | 7.779        | 1.568 |              |       |              |       |               |       |

Table SI-3: Means and standard deviations of various performance measures among different methods, based on 100 simulations. Parameter configuration:  $(n, p)=(100, 1000)$ ,  $\rho = 0.5$ .

| $(n, p)$    |    | Method   | Scenario    |        |             |        |             |        |
|-------------|----|----------|-------------|--------|-------------|--------|-------------|--------|
|             |    |          | (A)         |        | (B)         |        | (C)         |        |
|             |    |          | mean        | sd     | mean        | sd     | mean        | sd     |
| (50, 30)    | FP | Lasso    | 11.64       | 3.558  | 5.16        | 5.013  | 10.35       | 2.911  |
|             |    | ZS       | 11.71       | 3.588  | 5.44        | 4.243  | 10.20       | 2.449  |
|             |    | RobL     | 11.93       | 3.927  | 10.84       | 4.867  | 10.46       | 3.922  |
|             |    | RobZS    | 15.81       | 4.869  | 14.19       | 4.849  | 14.05       | 5.435  |
|             |    | SLTS     | 6.95        | 2.393  | 6.77        | 2.304  | 7.83        | 2.336  |
|             |    | ZS (B&T) | <b>1.78</b> | 1.244  | <b>1.90</b> | 1.925  | <b>4.02</b> | 1.859  |
|             |    |          |             |        |             |        |             |        |
|             | FN | Lasso    | <b>0.00</b> | 0.000  | 3.31        | 1.704  | 2.58        | 1.273  |
|             |    | ZS       | <b>0.00</b> | 0.000  | 2.91        | 1.429  | 2.72        | 0.944  |
|             |    | RobL     | 0.04        | 0.197  | 0.41        | 0.933  | 0.24        | 0.515  |
|             |    | RobZS    | 0.14        | 0.349  | <b>0.07</b> | 0.256  | <b>0.14</b> | 0.349  |
|             |    | SLTS     | 0.91        | 0.854  | 0.35        | 0.539  | 0.48        | 0.627  |
|             |    | ZS (B&T) | 0.22        | 0.579  | 3.76        | 1.357  | 3.92        | 1.051  |
|             |    |          |             |        |             |        |             |        |
| (100, 200)  | FP | Lasso    | 35.23       | 11.247 | 14.81       | 13.763 | 22.98       | 13.276 |
|             |    | ZS       | 34.11       | 11.611 | 13.35       | 11.111 | 24.61       | 7.406  |
|             |    | RobL     | 36.20       | 14.613 | 30.64       | 12.826 | 32.92       | 15.255 |
|             |    | RobZS    | 35.26       | 12.435 | 33.43       | 11.229 | 34.28       | 11.568 |
|             |    | SLTS     | 21.35       | 5.364  | 21.86       | 5.472  | 23.08       | 6.250  |
|             |    | ZS (B&T) | <b>1.27</b> | 1.246  | <b>1.56</b> | 1.725  | <b>4.81</b> | 1.745  |
|             |    |          |             |        |             |        |             |        |
|             | FN | Lasso    | <b>0.00</b> | 0.000  | 3.77        | 1.118  | 1.07        | 0.935  |
|             |    | ZS       | <b>0.00</b> | 0.000  | 3.60        | 1.181  | 2.99        | 0.893  |
|             |    | RobL     | 0.32        | 0.963  | 0.69        | 1.051  | 0.52        | 1.010  |
|             |    | RobZS    | 0.40        | 0.620  | <b>0.22</b> | 0.543  | <b>0.21</b> | 0.456  |
|             |    | SLTS     | 1.05        | 0.925  | 0.40        | 0.603  | 0.56        | 0.770  |
|             |    | ZS (B&T) | 0.28        | 0.653  | 4.20        | 0.791  | 4.34        | 0.768  |
|             |    |          |             |        |             |        |             |        |
| (100, 1000) | FP | Lasso    | 57.25       | 18.511 | 15.48       | 21.731 | 31.38       | 15.104 |
|             |    | ZS       | 57.64       | 17.505 | 17.64       | 20.104 | 32.11       | 10.087 |
|             |    | RobL     | 40.83       | 22.215 | 34.61       | 22.121 | 32.17       | 18.933 |
|             |    | RobZS    | 38.80       | 17.594 | 35.23       | 16.321 | 37.37       | 18.422 |
|             |    | SLTS     | 40.14       | 6.012  | 41.62       | 5.836  | 40.34       | 6.406  |
|             |    | ZS (B&T) | <b>1.70</b> | 1.534  | <b>2.07</b> | 2.248  | <b>4.27</b> | 1.752  |
|             |    |          |             |        |             |        |             |        |
|             | FN | Lasso    | 0.28        | 0.533  | 4.76        | 0.889  | 1.37        | 0.812  |
|             |    | ZS       | <b>0.16</b> | 0.420  | 4.47        | 1.010  | 3.41        | 0.842  |
|             |    | RobL     | 2.64        | 1.755  | 3.05        | 1.123  | 3.23        | 1.162  |
|             |    | RobZS    | 1.53        | 1.381  | <b>1.29</b> | 1.131  | <b>1.22</b> | 1.079  |
|             |    | SLTS     | 2.71        | 0.856  | 1.94        | 0.789  | 1.97        | 0.834  |
|             |    | ZS (B&T) | 0.72        | 1.064  | 4.59        | 0.866  | 4.71        | 0.656  |
|             |    |          |             |        |             |        |             |        |

Table SI-4: Comparison of selective performance among different methods, scenarios, and parameter configurations ( $\rho = 0.5$ ).

### 2.1.2 Level of contamination: 20%

Tables SI-5, SI-6, and SI-7 present the results for the low, moderate, and high-dimensional data configuration respectively with  $\rho = 0.2$ . Due to the high level of contamination we used for the comparison the prediction error, evaluated using a cleaned test set, and the trimmed prediction error with trim. levels equal to 0.2. Table SI-8 reports the comparison results of selective performance, FP and FN, among different methods, scenarios, and parameter configurations.

Tables SI-9, SI-10, SI-11, and SI-12 are related to a correlation structure with  $\rho = 0.5$ .

|     |       | PE           |       | PE (20%)     |       | loss 1       |       | loss 2       |        | loss $\infty$ |       |
|-----|-------|--------------|-------|--------------|-------|--------------|-------|--------------|--------|---------------|-------|
|     |       | mean         | sd    | mean         | sd    | mean         | sd    | mean         | sd     | mean          | sd    |
| (A) | Lasso | 0.407        | 0.125 | 0.236        | 0.075 | 1.260        | 0.565 | 0.168        | 0.110  | 0.218         | 0.064 |
|     | ZS    | <b>0.399</b> | 0.125 | <b>0.231</b> | 0.078 | <b>1.190</b> | 0.521 | <b>0.147</b> | 0.094  | <b>0.196</b>  | 0.059 |
|     | RobL  | 0.680        | 0.395 | 0.407        | 0.255 | 1.984        | 0.990 | 0.460        | 0.413  | 0.346         | 0.141 |
|     | RobZS | 1.002        | 0.613 | 0.602        | 0.417 | 3.073        | 1.205 | 0.831        | 0.657  | 0.440         | 0.161 |
|     | SLTS  | 1.495        | 0.862 | 0.904        | 0.507 | 2.966        | 1.099 | 1.361        | 0.870  | 0.654         | 0.208 |
| (B) | Lasso | 9.709        | 3.530 | 10.900       | 2.937 | 6.532        | 2.495 | 5.860        | 2.760  | 1.341         | 0.251 |
|     | ZS    | 9.352        | 3.340 | 10.709       | 2.958 | 6.384        | 2.321 | 5.613        | 2.627  | 1.312         | 0.265 |
|     | RobL  | 3.902        | 2.860 | 4.835        | 3.272 | 4.657        | 2.117 | 3.443        | 2.321  | 1.004         | 0.417 |
|     | RobZS | 0.606        | 0.474 | 0.799        | 0.642 | 1.709        | 0.732 | <b>0.349</b> | 0.439  | <b>0.296</b>  | 0.153 |
|     | SLTS  | <b>0.589</b> | 0.243 | <b>0.781</b> | 0.334 | <b>1.637</b> | 0.530 | 0.388        | 0.219  | 0.360         | 0.111 |
| (C) | Lasso | 25.381       | 6.659 | 14.271       | 4.063 | 15.394       | 3.901 | 21.654       | 10.409 | 2.424         | 0.771 |
|     | ZS    | 23.144       | 5.842 | 13.861       | 3.369 | 14.177       | 2.229 | 18.123       | 4.361  | 2.270         | 0.553 |
|     | RobL  | 1.592        | 0.659 | 2.067        | 0.866 | 3.586        | 0.947 | 1.572        | 0.646  | 0.716         | 0.179 |
|     | RobZS | <b>0.557</b> | 0.241 | <b>0.728</b> | 0.340 | 1.665        | 0.824 | <b>0.322</b> | 0.317  | <b>0.293</b>  | 0.126 |
|     | SLTS  | 0.609        | 0.262 | 0.797        | 0.357 | <b>1.550</b> | 0.595 | 0.403        | 0.284  | 0.369         | 0.128 |

Table SI-5: Means and standard deviations of various performance measures among different methods, based on 100 simulations. Parameter configuration:  $(n, p)=(50, 30)$ ,  $\rho = 0.2$ .

|     |       | PE           |       | PE (20%)     |       | loss 1       |       | loss 2       |       | loss $\infty$ |       |
|-----|-------|--------------|-------|--------------|-------|--------------|-------|--------------|-------|---------------|-------|
|     |       | mean         | sd    | mean         | sd    | mean         | sd    | mean         | sd    | mean          | sd    |
| (A) | Lasso | 0.379        | 0.074 | 0.222        | 0.046 | 1.520        | 0.525 | 0.159        | 0.072 | 0.211         | 0.067 |
|     | ZS    | <b>0.368</b> | 0.067 | <b>0.217</b> | 0.043 | <b>1.420</b> | 0.425 | <b>0.138</b> | 0.056 | <b>0.191</b>  | 0.052 |
|     | RobL  | 0.626        | 0.583 | 0.368        | 0.368 | 2.133        | 1.300 | 0.425        | 0.588 | 0.312         | 0.168 |
|     | RobZS | 1.124        | 0.476 | 0.660        | 0.293 | 3.515        | 0.946 | 0.988        | 0.506 | 0.521         | 0.148 |
|     | SLTS  | 1.120        | 0.538 | 0.649        | 0.318 | 3.003        | 1.020 | 1.035        | 0.600 | 0.547         | 0.165 |
| (B) | Lasso | 8.540        | 1.870 | 9.884        | 1.866 | 6.824        | 2.344 | 4.790        | 1.253 | 1.172         | 0.233 |
|     | ZS    | 8.486        | 1.925 | 9.802        | 1.950 | 6.825        | 2.324 | 4.704        | 1.248 | 1.151         | 0.251 |
|     | RobL  | 3.226        | 1.647 | 4.124        | 2.004 | 5.061        | 1.567 | 3.051        | 1.500 | 0.916         | 0.294 |
|     | RobZS | 0.527        | 0.160 | <b>0.703</b> | 0.208 | 1.989        | 0.601 | <b>0.290</b> | 0.137 | <b>0.280</b>  | 0.079 |
|     | SLTS  | <b>0.524</b> | 0.157 | <b>0.703</b> | 0.208 | <b>1.860</b> | 0.502 | 0.309        | 0.155 | 0.300         | 0.082 |
| (C) | Lasso | 5.776        | 1.160 | 3.482        | 0.691 | 10.825       | 1.543 | 11.265       | 1.343 | 1.737         | 0.162 |
|     | ZS    | 9.899        | 1.723 | 5.576        | 1.039 | 11.503       | 1.702 | 8.406        | 1.210 | 1.445         | 0.174 |
|     | RobL  | 1.511        | 0.547 | 1.978        | 0.743 | 3.918        | 1.210 | 1.387        | 0.545 | 0.685         | 0.153 |
|     | RobZS | <b>0.474</b> | 0.140 | <b>0.630</b> | 0.205 | 1.701        | 0.583 | <b>0.296</b> | 0.152 | <b>0.251</b>  | 0.084 |
|     | SLTS  | 0.528        | 0.172 | 0.701        | 0.239 | <b>1.534</b> | 0.504 | 0.341        | 0.202 | 0.327         | 0.093 |

Table SI-6: Means and standard deviations of various performance measures among different methods, based on 100 simulations. Parameter configuration:  $(n, p)=(100, 200)$ ,  $\rho = 0.2$ .

|     |       | PE           |       | PE (20%)     |       | loss 1       |       | loss 2       |       | loss $\infty$ |       |
|-----|-------|--------------|-------|--------------|-------|--------------|-------|--------------|-------|---------------|-------|
|     |       | mean         | sd    | mean         | sd    | mean         | sd    | mean         | sd    | mean          | sd    |
| (A) | Lasso | 0.505        | 0.138 | 0.296        | 0.081 | 2.253        | 0.755 | 0.301        | 0.162 | 0.287         | 0.080 |
|     | ZS    | <b>0.485</b> | 0.120 | <b>0.286</b> | 0.072 | <b>2.119</b> | 0.662 | <b>0.268</b> | 0.136 | <b>0.266</b>  | 0.076 |
|     | RobL  | 3.039        | 1.755 | 1.757        | 1.012 | 5.604        | 1.949 | 3.140        | 1.871 | 0.897         | 0.370 |
|     | RobZS | 1.668        | 1.130 | 0.955        | 0.656 | 4.134        | 1.649 | 1.619        | 1.289 | 0.615         | 0.286 |
|     | SLTS  | 2.647        | 1.072 | 1.506        | 0.597 | 5.549        | 1.312 | 2.685        | 1.062 | 0.868         | 0.211 |
| (B) | Lasso | 9.634        | 2.141 | 10.775       | 2.041 | 7.466        | 3.245 | 5.598        | 1.304 | 1.295         | 0.197 |
|     | ZS    | 9.751        | 2.038 | 10.898       | 1.980 | 7.679        | 3.412 | 5.673        | 1.202 | 1.293         | 0.208 |
|     | RobL  | 3.293        | 1.784 | 4.214        | 2.169 | 5.262        | 1.241 | 3.038        | 1.426 | 0.917         | 0.261 |
|     | RobZS | <b>0.900</b> | 0.475 | <b>1.177</b> | 0.604 | <b>3.023</b> | 0.934 | <b>0.699</b> | 0.510 | <b>0.416</b>  | 0.136 |
|     | SLTS  | 0.974        | 0.514 | 1.274        | 0.662 | 3.277        | 1.143 | 0.814        | 0.555 | 0.456         | 0.144 |
| (C) | Lasso | 3.466        | 0.834 | 2.250        | 0.542 | 8.253        | 0.889 | 6.613        | 0.666 | 1.288         | 0.134 |
|     | ZS    | 7.139        | 1.313 | 4.213        | 0.833 | 10.107       | 1.189 | 6.180        | 0.929 | 1.225         | 0.197 |
|     | RobL  | 2.816        | 0.968 | 3.709        | 1.286 | 5.379        | 1.358 | 2.700        | 0.980 | 0.895         | 0.165 |
|     | RobZS | <b>0.824</b> | 0.410 | <b>1.086</b> | 0.553 | 3.013        | 0.969 | <b>0.647</b> | 0.448 | <b>0.404</b>  | 0.141 |
|     | SLTS  | 1.000        | 0.474 | 1.322        | 0.649 | <b>2.830</b> | 1.062 | 0.893        | 0.536 | 0.498         | 0.156 |

Table SI-7: Means and standard deviations of various performance measures among different methods, based on 100 simulations. Parameter configuration:  $(n, p)=(100, 1000)$ ,  $\rho = 0.2$ .

| $(n, p)$    |    | Method | Scenario     |        |              |        |              |        |
|-------------|----|--------|--------------|--------|--------------|--------|--------------|--------|
|             |    |        | (A)          |        | (B)          |        | (C)          |        |
|             |    |        | mean         | sd     | mean         | sd     | mean         | sd     |
| (50, 30)    | FP | Lasso  | 10.46        | 4.890  | <b>4.23</b>  | 4.870  | 12.46        | 2.630  |
|             |    | ZS     | 10.44        | 4.509  | 4.34         | 4.479  | 11.62        | 2.473  |
|             |    | RobL   | 11.05        | 4.787  | 5.66         | 4.862  | 9.40         | 4.192  |
|             |    | RobZS  | 16.88        | 5.002  | 11.60        | 4.718  | 10.99        | 4.773  |
|             |    | SLTS   | <b>7.01</b>  | 2.588  | 7.33         | 2.400  | <b>5.55</b>  | 2.405  |
|             | FN | Lasso  | <b>0.00</b>  | 0.000  | 4.03         | 1.514  | 2.42         | 1.224  |
|             |    | ZS     | <b>0.00</b>  | 0.000  | 3.65         | 1.604  | 2.36         | 0.990  |
|             |    | RobL   | 0.02         | 0.200  | 2.45         | 2.022  | 0.88         | 0.769  |
|             |    | RobZS  | 0.07         | 0.256  | 0.04         | 0.243  | <b>0.03</b>  | 0.223  |
|             |    | SLTS   | 0.48         | 0.611  | <b>0.02</b>  | 0.141  | <b>0.03</b>  | 0.171  |
| (100, 200)  | FP | Lasso  | 27.42        | 12.763 | <b>11.27</b> | 11.478 | 22.26        | 10.031 |
|             |    | ZS     | 26.19        | 10.670 | 11.71        | 10.994 | 29.08        | 7.804  |
|             |    | RobL   | 28.49        | 11.923 | 14.75        | 12.485 | 23.64        | 10.506 |
|             |    | RobZS  | 34.95        | 11.435 | 27.17        | 12.096 | 24.99        | 10.453 |
|             |    | SLTS   | <b>20.22</b> | 5.323  | 22.23        | 5.245  | <b>9.74</b>  | 4.718  |
|             | FN | Lasso  | <b>0.00</b>  | 0.000  | 3.91         | 1.349  | 0.73         | 0.566  |
|             |    | ZS     | <b>0.00</b>  | 0.000  | 3.68         | 1.476  | 1.93         | 0.956  |
|             |    | RobL   | 0.07         | 0.293  | 2.18         | 1.642  | 0.80         | 0.752  |
|             |    | RobZS  | 0.07         | 0.256  | <b>0.00</b>  | 0.000  | <b>0.00</b>  | 0.000  |
|             |    | SLTS   | 0.22         | 0.484  | <b>0.00</b>  | 0.000  | 0.02         | 0.141  |
| (100, 1000) | FP | Lasso  | 45.53        | 18.607 | <b>13.20</b> | 16.909 | 23.09        | 9.484  |
|             |    | ZS     | 42.27        | 15.614 | 14.44        | 18.589 | 37.72        | 10.549 |
|             |    | RobL   | 40.04        | 20.747 | 24.02        | 17.580 | 27.62        | 13.510 |
|             |    | RobZS  | 41.25        | 17.076 | 37.59        | 14.063 | 41.34        | 14.195 |
|             |    | SLTS   | <b>39.78</b> | 7.624  | 38.06        | 7.799  | <b>20.77</b> | 8.546  |
|             | FN | Lasso  | <b>0.00</b>  | 0.000  | 4.87         | 1.031  | 1.17         | 0.792  |
|             |    | ZS     | <b>0.00</b>  | 0.000  | 4.72         | 1.155  | 2.35         | 0.833  |
|             |    | RobL   | 2.19         | 1.779  | 2.41         | 1.706  | 2.04         | 1.072  |
|             |    | RobZS  | 0.74         | 1.143  | <b>0.07</b>  | 0.293  | <b>0.07</b>  | 0.256  |
|             |    | SLTS   | 1.64         | 0.948  | 0.15         | 0.386  | 0.26         | 0.525  |

Table SI-8: Comparison of selective performance among different methods, scenarios, and parameter configurations ( $\rho = 0.2$ ).

|     |       | PE           |       | PE (20%)     |       | loss 1       |       | loss 2       |        | loss $\infty$ |       |
|-----|-------|--------------|-------|--------------|-------|--------------|-------|--------------|--------|---------------|-------|
|     |       | mean         | sd    | mean         | sd    | mean         | sd    | mean         | sd     | mean          | sd    |
| (A) | Lasso | 0.421        | 0.118 | 0.250        | 0.083 | 1.704        | 0.675 | 0.286        | 0.166  | 0.280         | 0.090 |
|     | ZS    | <b>0.391</b> | 0.104 | <b>0.231</b> | 0.065 | <b>1.523</b> | 0.566 | <b>0.232</b> | 0.140  | <b>0.252</b>  | 0.081 |
|     | RobL  | 0.668        | 0.440 | 0.398        | 0.257 | 2.441        | 1.164 | 0.664        | 0.591  | 0.427         | 0.185 |
|     | RobZS | 0.927        | 0.373 | 0.550        | 0.227 | 3.493        | 0.945 | 1.074        | 0.540  | 0.529         | 0.148 |
|     | SLTS  | 1.250        | 0.475 | 0.747        | 0.299 | 3.358        | 0.904 | 1.677        | 0.713  | 0.730         | 0.161 |
| (B) | Lasso | 8.493        | 3.104 | 9.800        | 2.980 | 6.734        | 2.790 | 6.207        | 3.249  | 1.363         | 0.302 |
|     | ZS    | 8.083        | 2.526 | 9.575        | 2.739 | 6.354        | 2.341 | 5.704        | 2.768  | 1.345         | 0.276 |
|     | RobL  | 2.068        | 1.628 | 2.702        | 2.164 | 3.856        | 1.569 | 2.486        | 1.907  | 0.837         | 0.388 |
|     | RobZS | 0.588        | 0.261 | 0.785        | 0.368 | 2.112        | 0.809 | <b>0.456</b> | 0.309  | <b>0.347</b>  | 0.114 |
|     | SLTS  | <b>0.583</b> | 0.243 | <b>0.777</b> | 0.346 | <b>1.882</b> | 0.614 | 0.530        | 0.319  | 0.420         | 0.132 |
| (C) | Lasso | 26.858       | 8.908 | 15.546       | 4.543 | 16.323       | 5.348 | 30.367       | 17.613 | 3.181         | 0.938 |
|     | ZS    | 24.695       | 6.512 | 16.195       | 3.785 | 13.808       | 2.569 | 20.514       | 6.218  | 2.657         | 0.648 |
|     | RobL  | 1.537        | 0.722 | 2.040        | 0.977 | 4.036        | 1.081 | 1.959        | 0.937  | 0.759         | 0.204 |
|     | RobZS | <b>0.552</b> | 0.225 | <b>0.739</b> | 0.314 | <b>1.966</b> | 0.810 | <b>0.424</b> | 0.282  | <b>0.339</b>  | 0.120 |
|     | SLTS  | 0.634        | 0.285 | 0.854        | 0.404 | 2.022        | 0.747 | 0.674        | 0.439  | 0.480         | 0.168 |

Table SI-9: Means and standard deviations of various performance measures among different methods, based on 100 simulations. Parameter configuration:  $(n, p)=(50, 30)$ ,  $\rho = 0.5$ .

|     |       | PE           |       | PE (20%)     |       | loss 1       |       | loss 2       |       | loss $\infty$ |       |
|-----|-------|--------------|-------|--------------|-------|--------------|-------|--------------|-------|---------------|-------|
|     |       | mean         | sd    | mean         | sd    | mean         | sd    | mean         | sd    | mean          | sd    |
| (A) | Lasso | 0.444        | 0.108 | 0.257        | 0.073 | 2.229        | 0.714 | 0.317        | 0.155 | 0.294         | 0.080 |
|     | ZS    | <b>0.434</b> | 0.103 | <b>0.251</b> | 0.069 | <b>2.116</b> | 0.663 | <b>0.296</b> | 0.150 | <b>0.283</b>  | 0.083 |
|     | RobL  | 0.765        | 0.680 | 0.444        | 0.400 | 3.104        | 1.413 | 0.818        | 0.967 | 0.440         | 0.218 |
|     | RobZS | 1.132        | 0.500 | 0.654        | 0.311 | 4.038        | 1.111 | 1.461        | 0.774 | 0.635         | 0.191 |
|     | SLTS  | 1.264        | 0.442 | 0.733        | 0.276 | 3.910        | 1.018 | 1.763        | 0.744 | 0.724         | 0.165 |
| (B) | Lasso | 8.075        | 2.122 | 9.611        | 2.061 | 6.980        | 3.532 | 5.502        | 2.042 | 1.272         | 0.205 |
|     | ZS    | 7.851        | 1.734 | 9.403        | 1.865 | 6.898        | 2.676 | 5.346        | 1.455 | 1.264         | 0.204 |
|     | RobL  | 1.973        | 1.036 | 2.613        | 1.370 | 4.854        | 1.341 | 2.581        | 1.349 | 0.839         | 0.264 |
|     | RobZS | <b>0.581</b> | 0.152 | <b>0.779</b> | 0.215 | 2.692        | 0.728 | <b>0.529</b> | 0.233 | <b>0.383</b>  | 0.094 |
|     | SLTS  | 0.595        | 0.192 | 0.797        | 0.271 | <b>2.554</b> | 0.700 | 0.615        | 0.309 | 0.418         | 0.104 |
| (C) | Lasso | 6.487        | 1.365 | 3.662        | 0.835 | 11.582       | 2.080 | 14.509       | 1.863 | 2.210         | 0.294 |
|     | ZS    | 11.358       | 2.040 | 6.201        | 1.155 | 11.712       | 2.136 | 10.970       | 1.783 | 1.901         | 0.311 |
|     | RobL  | 1.556        | 0.581 | 2.049        | 0.810 | 4.680        | 1.313 | 1.974        | 0.844 | 0.739         | 0.173 |
|     | RobZS | <b>0.521</b> | 0.211 | <b>0.684</b> | 0.276 | 2.318        | 0.764 | <b>0.433</b> | 0.329 | <b>0.345</b>  | 0.114 |
|     | SLTS  | 0.605        | 0.245 | 0.796        | 0.325 | <b>2.225</b> | 0.793 | 0.680        | 0.419 | 0.456         | 0.129 |

Table SI-10: Means and standard deviations of various performance measures among different methods, based on 100 simulations. Parameter configuration:  $(n, p)=(100, 200)$ ,  $\rho = 0.5$ .

|     |       | PE           |       | PE (20%)     |       | loss 1       |       | loss 2       |       | loss $\infty$ |       |
|-----|-------|--------------|-------|--------------|-------|--------------|-------|--------------|-------|---------------|-------|
|     |       | mean         | sd    | mean         | sd    | mean         | sd    | mean         | sd    | mean          | sd    |
| (A) | Lasso | 0.686        | 0.205 | 0.407        | 0.137 | 3.575        | 0.736 | 0.811        | 0.419 | 0.476         | 0.135 |
|     | ZS    | <b>0.663</b> | 0.208 | <b>0.389</b> | 0.138 | <b>3.434</b> | 0.735 | <b>0.755</b> | 0.435 | <b>0.468</b>  | 0.162 |
|     | RobL  | 2.461        | 1.214 | 1.400        | 0.698 | 5.676        | 1.393 | 3.517        | 1.621 | 0.988         | 0.287 |
|     | RobZS | 1.658        | 0.836 | 0.977        | 0.504 | 4.792        | 1.362 | 2.336        | 1.307 | 0.778         | 0.264 |
|     | SLTS  | 2.238        | 0.736 | 1.310        | 0.458 | 5.903        | 1.095 | 3.197        | 0.979 | 0.961         | 0.161 |
| (B) | Lasso | 8.542        | 1.921 | 10.109       | 2.040 | 7.273        | 3.277 | 5.915        | 1.188 | 1.359         | 0.150 |
|     | ZS    | 8.619        | 2.026 | 10.158       | 2.062 | 7.403        | 3.543 | 5.953        | 1.244 | 1.363         | 0.150 |
|     | RobL  | 2.676        | 0.962 | 3.521        | 1.272 | 5.719        | 1.122 | 3.637        | 0.955 | 1.024         | 0.168 |
|     | RobZS | <b>1.135</b> | 0.545 | <b>1.498</b> | 0.712 | <b>3.977</b> | 1.137 | <b>1.477</b> | 0.782 | <b>0.649</b>  | 0.187 |
|     | SLTS  | 1.172        | 0.495 | 1.535        | 0.627 | 4.443        | 1.103 | 1.570        | 0.709 | 0.659         | 0.158 |
| (C) | Lasso | 3.749        | 0.913 | 2.304        | 0.610 | 9.211        | 0.971 | 8.730        | 0.988 | 1.656         | 0.238 |
|     | ZS    | 8.120        | 1.606 | 4.547        | 0.900 | 10.257       | 1.560 | 8.798        | 1.267 | 1.673         | 0.228 |
|     | RobL  | 2.501        | 0.808 | 3.306        | 1.106 | 5.662        | 1.225 | 3.363        | 0.889 | 0.981         | 0.143 |
|     | RobZS | <b>1.017</b> | 0.497 | <b>1.344</b> | 0.680 | <b>3.735</b> | 1.008 | <b>1.314</b> | 0.764 | <b>0.591</b>  | 0.193 |
|     | SLTS  | 1.145        | 0.441 | 1.524        | 0.617 | 3.913        | 1.074 | 1.660        | 0.687 | 0.692         | 0.156 |

Table SI-11: Means and standard deviations of various performance measures among different methods, based on 100 simulations. Parameter configuration:  $(n, p)=(100, 1000)$ ,  $\rho = 0.5$ .

| $(n, p)$    |    | Method | Scenario     |        |              |        |              |        |
|-------------|----|--------|--------------|--------|--------------|--------|--------------|--------|
|             |    |        | (A)          |        | (B)          |        | (C)          |        |
|             |    |        | mean         | sd     | mean         | sd     | mean         | sd     |
| (50, 30)    | FP | Lasso  | 12.15        | 4.480  | 4.03         | 4.670  | 9.95         | 3.176  |
|             |    | ZS     | 11.66        | 3.906  | <b>3.92</b>  | 4.007  | 9.52         | 2.359  |
|             |    | RobL   | 12.95        | 4.425  | 6.27         | 4.537  | 9.35         | 3.901  |
|             |    | RobZS  | 16.14        | 5.365  | 12.26        | 4.215  | 11.22        | 4.605  |
|             |    | SLTS   | <b>7.08</b>  | 2.232  | 7.32         | 2.369  | <b>5.91</b>  | 2.099  |
|             | FN | Lasso  | 0.01         | 0.100  | 4.52         | 1.403  | 2.18         | 1.258  |
|             |    | ZS     | <b>0.00</b>  | 0.000  | 4.15         | 1.438  | 2.33         | 1.016  |
|             |    | RobL   | 0.08         | 0.307  | 1.88         | 1.996  | 1.20         | 1.101  |
|             |    | RobZS  | 0.15         | 0.411  | <b>0.05</b>  | 0.261  | <b>0.04</b>  | 0.197  |
|             |    | SLTS   | 0.81         | 0.825  | 0.12         | 0.327  | 0.28         | 0.533  |
| (100, 200)  | FP | Lasso  | 35.56        | 12.871 | <b>9.11</b>  | 13.339 | 17.27        | 11.585 |
|             |    | ZS     | 33.66        | 12.849 | 9.47         | 11.585 | 24.57        | 7.178  |
|             |    | RobL   | 35.90        | 12.114 | 20.80        | 16.122 | 24.95        | 12.591 |
|             |    | RobZS  | 34.80        | 12.428 | 32.43        | 11.559 | 29.44        | 11.417 |
|             |    | SLTS   | <b>21.62</b> | 5.594  | 24.17        | 6.239  | <b>13.34</b> | 5.756  |
|             | FN | Lasso  | <b>0.00</b>  | 0.000  | 4.70         | 1.106  | 1.50         | 0.927  |
|             |    | ZS     | <b>0.00</b>  | 0.000  | 4.39         | 1.278  | 3.06         | 0.789  |
|             |    | RobL   | 0.23         | 0.827  | 2.22         | 1.618  | 1.31         | 1.143  |
|             |    | RobZS  | 0.53         | 0.745  | <b>0.04</b>  | 0.197  | <b>0.04</b>  | 0.243  |
|             |    | SLTS   | 1.02         | 0.953  | 0.08         | 0.273  | 0.13         | 0.442  |
| (100, 1000) | FP | Lasso  | 56.67        | 18.029 | <b>10.90</b> | 17.712 | <b>24.24</b> | 13.446 |
|             |    | ZS     | 54.76        | 16.118 | 11.96        | 18.473 | 29.61        | 8.935  |
|             |    | RobL   | <b>34.47</b> | 20.586 | 22.79        | 18.578 | 24.45        | 14.422 |
|             |    | RobZS  | 37.91        | 17.545 | 35.23        | 14.602 | 36.76        | 15.428 |
|             |    | SLTS   | 40.38        | 7.318  | 42.45        | 6.452  | 26.15        | 7.488  |
|             | FN | Lasso  | 0.24         | 0.588  | 5.32         | 0.709  | 1.83         | 1.006  |
|             |    | ZS     | <b>0.23</b>  | 0.633  | 5.13         | 0.895  | 3.50         | 0.948  |
|             |    | RobL   | 2.86         | 1.706  | 3.43         | 1.174  | 3.24         | 0.878  |
|             |    | RobZS  | 1.52         | 1.322  | <b>0.65</b>  | 0.770  | <b>0.70</b>  | 0.916  |
|             |    | SLTS   | 2.63         | 0.917  | 0.87         | 0.800  | 1.11         | 0.898  |

Table SI-12: Comparison of selective performance among different methods, scenarios, and parameter configurations ( $\rho = 0.5$ ).

## 2.2 Effect of debiasing strategies

The RobZS estimator, as defined in Equation (10) of the main paper, is now called naïve RobZS to distinguish this direct solution from the debiased ones. For an empirical comparison of the prediction accuracy of the naïve, rescaled, relaxed and hybrid RobZS estimators, we consider a Monte Carlo simulation with 50 repetitions, generating the training and test data in a non-contaminated scenario, i.e. scenario (A), according to the simulation setting outlined in the main paper, but considering an elastic-net penalty.

Table SI-13 and Figure SI-1 summarize the prediction errors (means and standard deviations) among the different debiasing strategies and parameter configurations .

| <b>RobZS</b> | $n = 50, p = 30$ |       | $n = 100, p = 200$ |       | $n = 100, p = 1000$ |       |
|--------------|------------------|-------|--------------------|-------|---------------------|-------|
|              | mean             | sd    | mean               | sd    | mean                | sd    |
| naïve        | 0.986            | 0.598 | 1.884              | 1.342 | 3.728               | 1.726 |
| rescaled     | 1.024            | 0.580 | 1.791              | 1.271 | 3.673               | 1.814 |
| relaxed      | 0.996            | 0.597 | 2.467              | 1.272 | 4.063               | 1.541 |
| hybrid       | <b>0.831</b>     | 0.414 | <b>1.137</b>       | 0.581 | <b>2.329</b>        | 1.485 |

Table SI-13: Means and standard deviations of the prediction error among different debiasing strategies and parameter configurations ( $\rho = 0.2$ ) based on 50 simulations.

It can be seen that hybrid RobZS outperforms the naïve RobZS by providing higher predictive accuracy in all simulation settings. The reduction in prediction error in the low, medium, and high dimensional setting are 16%, 40% and 38%, respectively.

Figure SI-1 shows also box plots related to the empirical distribution of the optimal  $\alpha$  parameters associated to the naïve RobZS solution. It can be seen that in low dimension ( $n > p$ ) the RobZS solution produces, as expected, sparse solutions. In high dimensional setting, the naïve RobZS tends to select a large number of false positives, the optimal  $\alpha$  parameters are in fact close to zero, thus the two-step hybrid rescaling helps a lot to remedy this distortion.



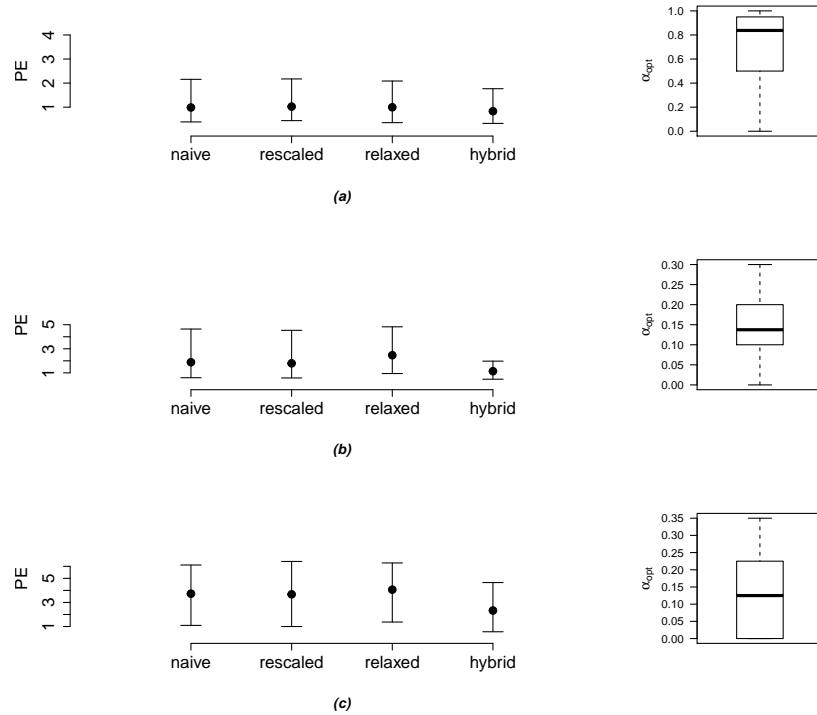

Figure SI-1: Average prediction error of different estimators, naïve, rescaled, relaxed and hybrid RobZS, in scenario (A), over all simulation runs. The error bars extend from the 5% to the 95% quantile. The box plots refer to the optimal  $\alpha$  parameter associated to the naïve RobZS solution. Parameter configuration: (a)  $n = 50, p = 30, \rho = 0.2$ , (b)  $n = 100, p = 200, \rho = 0.2$ , (c)  $n = 100, p = 1000, \rho = 0.2$

### 2.3 Simulations with varying sparsity

The same simulation setting as in Section 3.1 of the main paper is used, but here the sparsity of the regression coefficient vector  $\beta$  is changed. Originally, this vector consisted of the entries  $\beta_1 = 1$ ,  $\beta_2 = -0.8$ ,  $\beta_3 = 0.6$ ,  $\beta_6 = -1.5$ ,  $\beta_7 = -0.5$ ,  $\beta_8 = 1.2$  and  $\beta_j = 0$  for  $j \in \{1, \dots, p\} \setminus \{1, 2, 3, 6, 7, 8\}$ . Here, we modify in turn two zero entries by values  $+1$  and  $-1$ , and thus in each step, two more active variables in the models are generated. We use  $n = 50$ ,  $p = 50$ ,  $\rho = 0.2$ , and the number of active variables is changed from 6 to 26. Figure SI-2 presents the resulting means over 10 replications in each step (solid lines). The dashed lines are the means plus/minus two times the standard errors from the replications. The left plot panels are for non-contaminated data, i.e. scenario (A), the right panels for 10% contamination using scenario (C). The red lines are for ZS, the blue lines for RobZS. In the uncontaminated setting we can see that RobZS loses precision if the sparsity gets lower (more active variables). This loss is based on an increasing level of FN (true active variables are not identified). Also, FP should decrease with an increasing number of active variables, since FP refers to the number of noise (inactive) variables that are not identified. For ZS, the PE increases only slightly, and this is based on much less sparser models: FN is always close to zero, and FP even increases at the beginning.

In the contaminated scenario (right column of Figure SI-2), RobZS shows essentially the same behavior as in the uncontaminated case. However, ZS is clearly affected by the outliers, which is visible in terms of a much higher prediction error, and a clear increase for the FN. Only with a higher number of active variables (less sparsity in the model), FN and FP are comparable for the non-robust and the robust method, which reflects the difficulty of these methods to identify the correct model. It can be concluded that higher sparsity is connected to more reliable model identification.

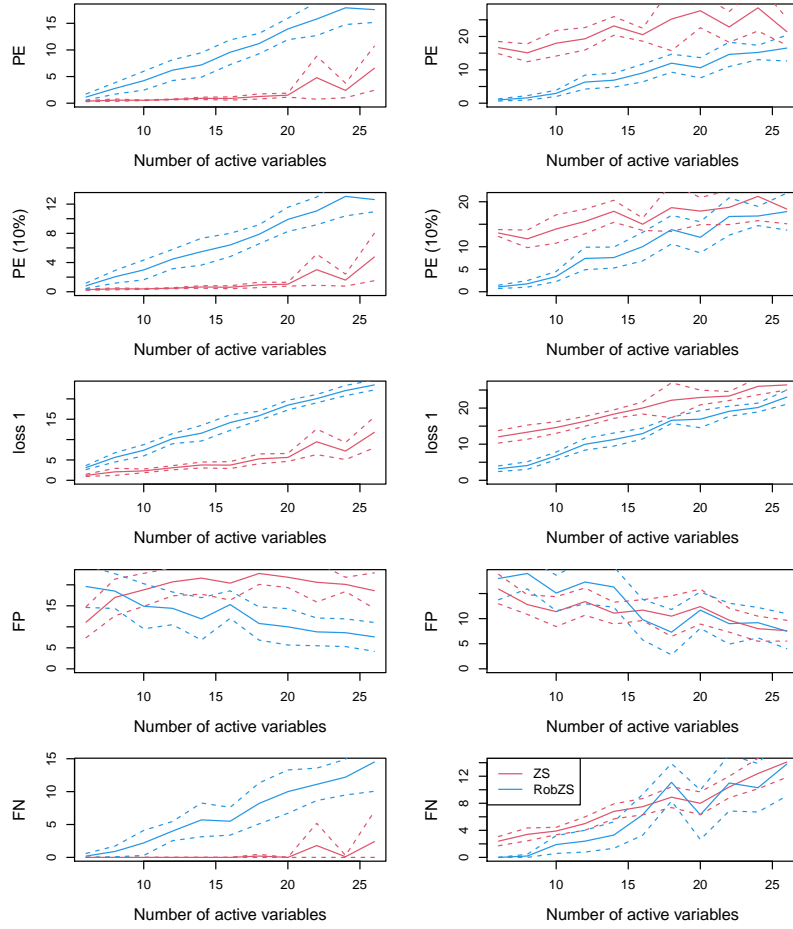

Figure SI-2: Performance of the ZS (red) and RobZS (blue) estimators by increasing the number of active variables. Left column for scenario (A), right column for scenario (C). Here,  $n = 50$ ,  $p = 50$ ,  $\rho = 0.2$ ; shown are means (solid lines) plus/minus two standard errors derived from 10 simulation replications at each step.

## 2.4 Simulations using the elastic-net penalty

So far, all simulations were done just with a lasso penalty, except the investigation of the debiasing procedures in Section 2.2. The purpose of the following simulations is a direct comparison of ZS and RobZS by making use of their elastic-net penalties. We follow the strategy for the tuning parameter selection as mentioned in Section 1.

The simulation setting is different here. We consider two sets of highly correlated variables which are relevant for explaining the response, and a set of weakly correlated variables which does not contribute to the explanation of the response. In each of the 100 simulation replications, we generate  $n = 50$  observations, and  $p = 80$ . The two blocks of highly correlated variables consist of 8 variables each, and they were (independently) generated as explained in Section 3.1 of the main paper, but with  $\rho = 0.9$ . The remaining block of 64 variables is also generated in the same way, but with  $\rho = 0.2$ . The entries of the variables of this last block in the vector  $\beta$  are all zeros, thus these are the noise variables, whereas the entries for the first blocks are alternating with  $+1$  and  $-1$ . We used the simulation scenarios (A) (no contamination) and (B) (vertical outliers), and the results are presented in Table SI-14. Here we are also interested in the resulting optimized values of the tuning parameter  $\alpha$  of the elastic-net penalty (last rows). It can be seen that in both scenarios, RobZS leads to a much lower value compared to ZS. If  $\alpha$  gets close to zero, the penalization corresponds essentially to a ridge penalty, and the variable selection property is lost. This can also be seen in the lower values of FN, but simultaneously in higher values of FP for RobZS. Still RobZS is very competitive concerning the prediction error, and in the contaminated setting it clearly outperforms ZS.

|               | <b>Method</b> | <i>Scenario</i> |       |            |       |
|---------------|---------------|-----------------|-------|------------|-------|
|               |               | <b>(A)</b>      |       | <b>(B)</b> |       |
|               |               | mean            | sd    | mean       | sd    |
| PE            | ZS            | 1.655           | 0.397 | 3.279      | 1.520 |
|               | RobZS         | 1.665           | 0.326 | 1.640      | 0.392 |
| PE (10%)      | ZS            | 1.187           | 0.301 | 3.621      | 1.679 |
|               | RobZS         | 1.187           | 0.255 | 1.828      | 0.466 |
| loss 1        | ZS            | 16.89           | 1.130 | 17.75      | 2.603 |
|               | RobZS         | 17.02           | 0.823 | 17.03      | 1.009 |
| loss 2        | ZS            | 14.96           | 0.857 | 16.44      | 1.266 |
|               | RobZS         | 15.41           | 0.528 | 15.41      | 0.478 |
| loss $\infty$ | ZS            | 1.023           | 0.053 | 1.035      | 0.084 |
|               | RobZS         | 1.044           | 0.040 | 1.046      | 0.045 |
| FP            | ZS            | 25.6            | 20.2  | 15.7       | 21.8  |
|               | RobZS         | 42.3            | 24.1  | 42.3       | 26.0  |
| FN            | ZS            | 9.6             | 4.9   | 12.7       | 5.5   |
|               | RobZS         | 5.2             | 5.7   | 4.7        | 5.8   |
| $\alpha$      | ZS            | 0.48            | 0.34  | 0.41       | 0.32  |
|               | RobZS         | 0.10            | 0.13  | 0.06       | 0.07  |

Table SI-14: Comparison ZS and RobZS by making use of their elastic-net penalties, for uncontaminated (A) and contaminated (B) data. The last two rows correspond to the optimized parameter  $\alpha$  of the penalty.

### 3 Additional Application Results

In this section we report further results related to the application to human gut microbiome data.

Figure SI-3 shows the mean regression coefficients over all CV models by Lasso, ZeroSum, RobL, RobZS, and SLTS. The vertical dashed lines indicate bacterial taxa where the difference between ZeroSum and RobZS is greater than 0.01. Such differences may appear because of outliers particularly in these variables.

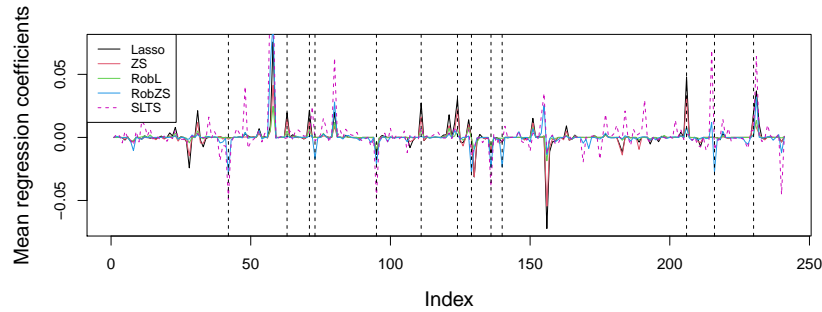

Figure SI-3: Analysis of gut microbiome data. Mean regression coefficients over all CV replications by Lasso, ZeroSum, RobL, RobZS, and SLTS.

A non-robust method may wrongly understand those values as important signals and include the variables with higher importance in the model. On the other hand, outliers may also lead to a masking effect (Maronna *et al.*, 2006), which can cause that crucial variables appear as less important in the classical fit.

### References

Bates, S. and Tibshirani, R. (2019). Log-ratio lasso: Scalable, sparse estimation for log-ratio models. *Biometrics*, **75**(2), 613–624.

Maronna, R., Martin, R., and Yohai, V. (2006). *Robust Statistics*. John Wiley & Sons, Ltd.
